# Supplementary material for: A gene-derived SNP-based high resolution linkage map of carrot including the location of QTL conditioning root and leaf anthocyanin pigmentation
Source: PubMed Central journal article supplement (PMC4378384; doi:10.1186/1471-2164-15-1118), 2014-12-16
Supplement: 12864_2014_6833_MOESM1_ESM.pdf [file 12864_2014_6833_MOESM1_ESM.pdf]

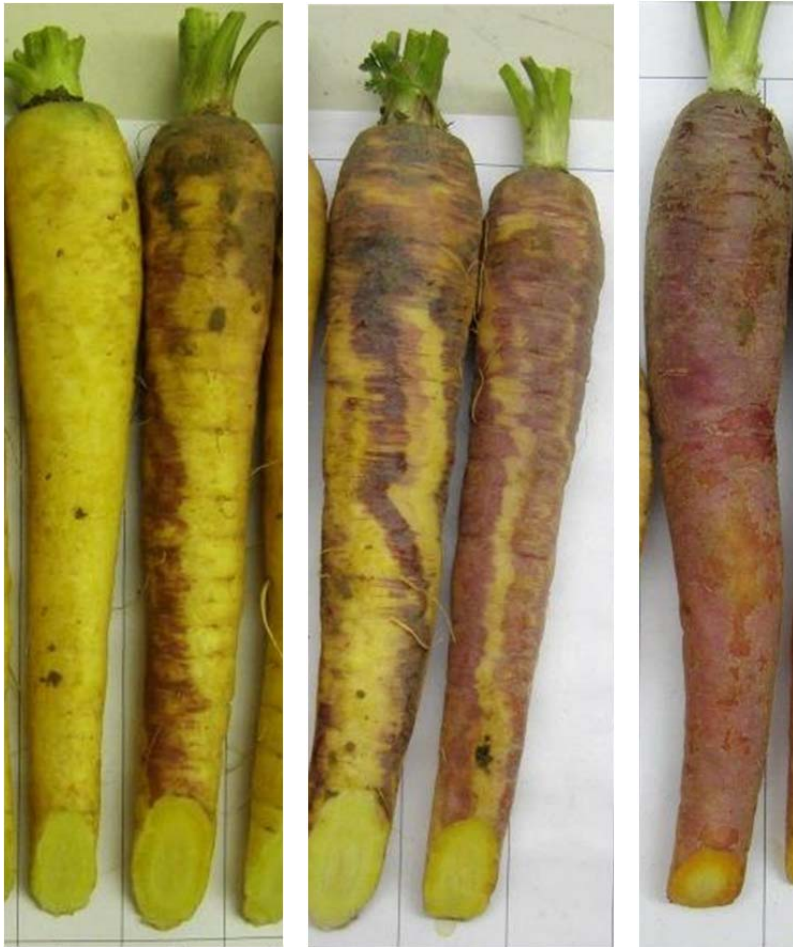

**Additional file 2.** Examples of variation observed for root total pigment estimate (RTPE) in the 70349 population ranging from 0% to 20%, 30%, 80%, and 100% (left to right)
