# Supplementary material for: A gene-derived SNP-based high resolution linkage map of carrot including the location of QTL conditioning root and leaf anthocyanin pigmentation
Source: PubMed Central journal article supplement (PMC4378384; doi:10.1186/1471-2164-15-1118), 2014-12-16
Supplement: 12864_2014_6833_MOESM2_ESM.pdf [file 12864_2014_6833_MOESM2_ESM.pdf]

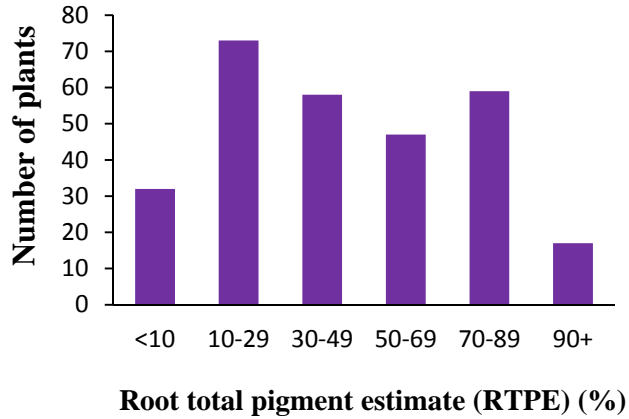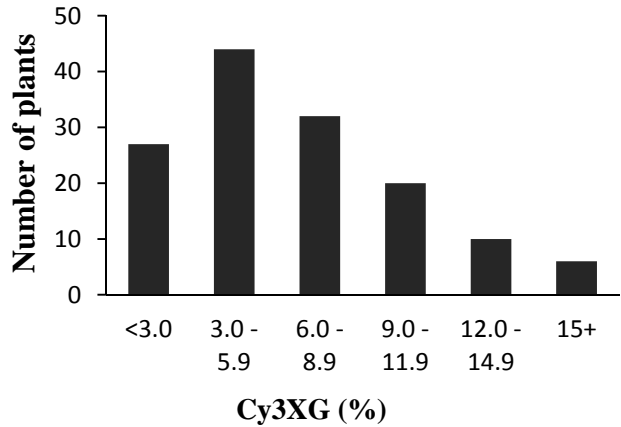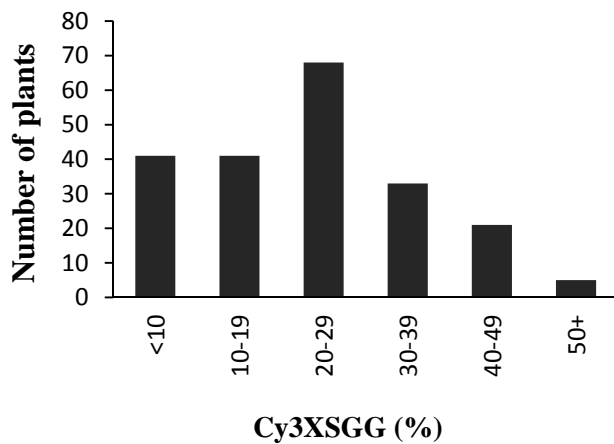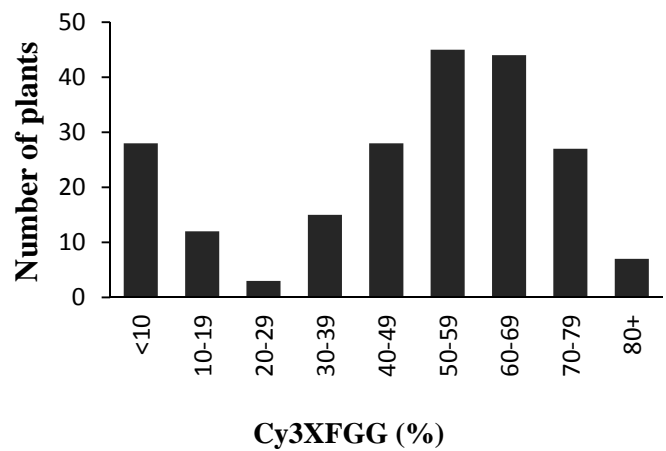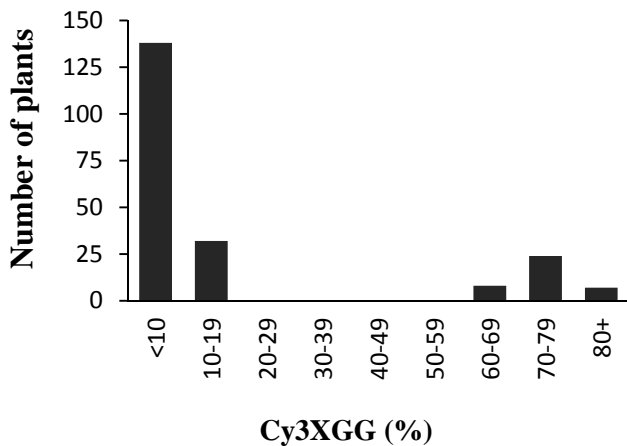

**Additional file 3. Frequency distribution of ‘root total pigment estimate’ (RTPE) and of individual anthocyanin pigment compounds in roots of 70349.** Pigment Cy3XCGG was not included because it was only detected in trace amounts in this population. Distribution of RTPE was based on data from 279 F<sub>2</sub> individuals, whereas analysis of pigment compounds used HPLC data from 208 plants. In both cases, only roots containing visible purple pigmentation were used.
