# Supplementary material for: A gene-derived SNP-based high resolution linkage map of carrot including the location of QTL conditioning root and leaf anthocyanin pigmentation
Source: PubMed Central journal article supplement (PMC4378384; doi:10.1186/1471-2164-15-1118), 2014-12-16

# Additional file 7: Molecular structure of anthocyanins from carrot root

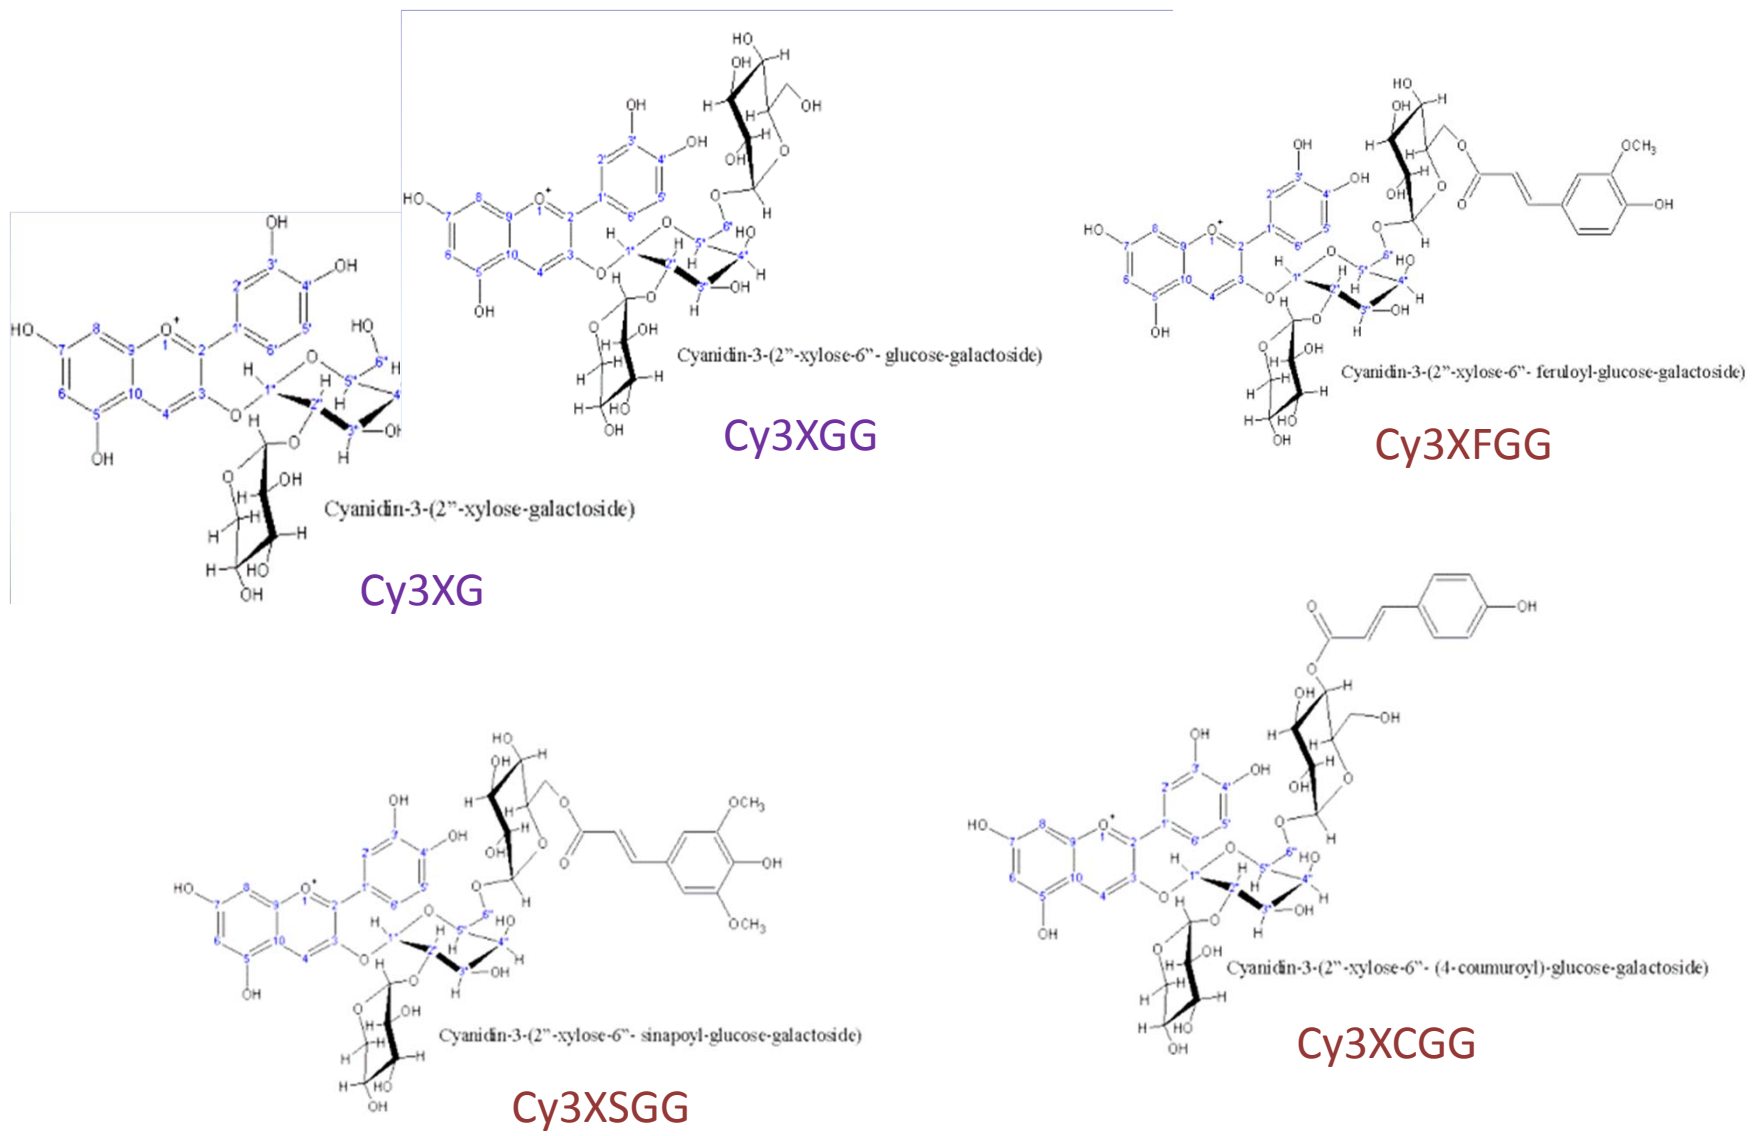

Supplement: 12864_2014_6833_MOESM3_ESM.pdf [file 12864_2014_6833_MOESM3_ESM.pdf]
