# Supplementary material for: A gene-derived SNP-based high resolution linkage map of carrot including the location of QTL conditioning root and leaf anthocyanin pigmentation
Source: PubMed Central journal article supplement (PMC4378384; doi:10.1186/1471-2164-15-1118), 2014-12-16
Supplement: 12864_2014_6833_MOESM4_ESM.pdf [file 12864_2014_6833_MOESM4_ESM.pdf]

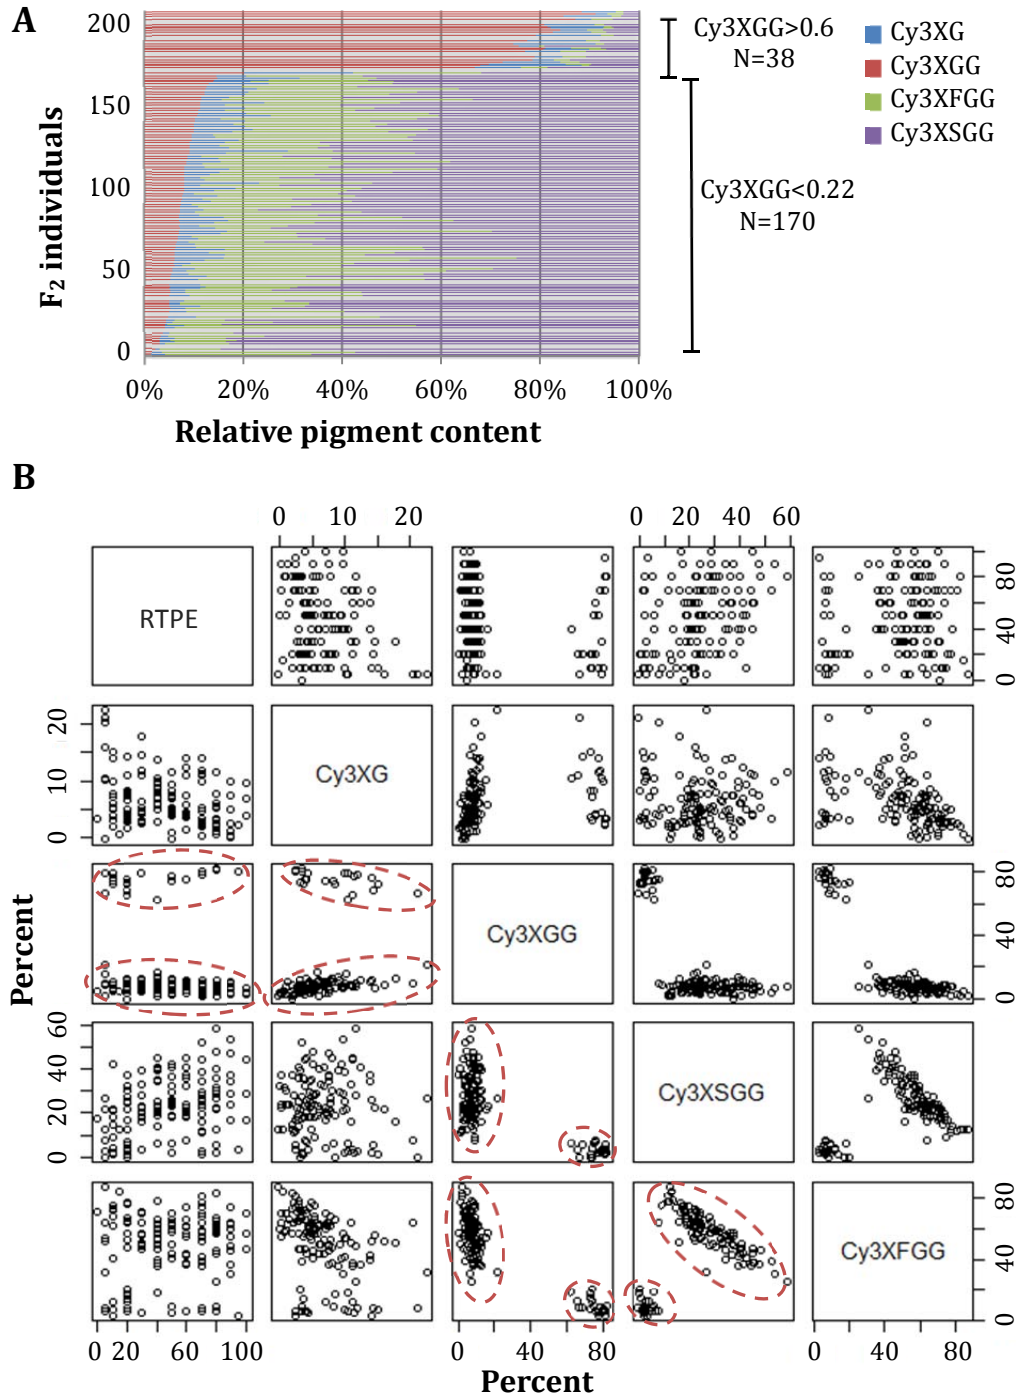

**Additional file 4: table S2.** Pair-wise Spearman rank correlation values among root anthocyanin pigments in 70349

|                       | RTPE        | Cy3XG        | Cy3XFGG<br>>0.2 | Cy3XFGG<br><0.2 | Cy3XSGG<br>>0.1 | Cy3XSGG<br><0.1 |
|-----------------------|-------------|--------------|-----------------|-----------------|-----------------|-----------------|
| <b>Cy3XG</b>          | -0.24       |              |                 |                 |                 |                 |
| <b>Cy3XSGG</b>        | <b>0.34</b> | 0.01         |                 |                 |                 |                 |
| <b>Cy3XFGG</b>        | 0.005       | <b>-0.54</b> |                 |                 |                 |                 |
| <b>Cy3XGG&lt;0.2</b>  | -0.23       | <b>0.65</b>  | <b>-0.48</b>    |                 | 0.12            |                 |
| <b>Cy3XGG&gt;0.6</b>  | 0.44        | -0.47        |                 | <b>-0.66</b>    |                 | -0.22           |
| <b>Cy3XFGG&gt;0.2</b> |             |              |                 |                 | <b>-0.87</b>    |                 |
| <b>Cy3XFGG&lt;0.2</b> |             |              |                 |                 |                 | 0.14            |

Significant correlations (P<0.001) are indicated in bold.
